# Supplementary material for: The electronic and diffusion properties of metal adatoms on graphene sheets: a first-principles study
Source: Royal Society of Chemistry journal article supplement (doi:10.1039/c7ra04519k), 2017-01-01
Supplement: c7ra04519k1.pdf [file c7ra04519k1.pdf]

**Supporting Information:**

**Fig.S1.** Top and side views of the geometric structures for Ni adatom adsorbs on Pt(111) supported PBG and DBG sheets. (a)-(b) H site of top and bottom layer (PBG) and (c)-(d) upper and below SV site (DBG), respectively. Black, gray and green balls represent C, Ni and Pt atoms, respectively.

**Fig.S2.** Spin-resolved TDOS and PDOS for (a)-(b) Ni and (c)-(d) Fe atom anchors on PBG (H site) and (b) DBG (below SV site) using PBE+U calculation. The solid lines represent the TDOS of PBG (or DBG) with the adsorbed Ni (or Fe) atom and dashed lines represent the PDOS of Ni (or Fe) 3d states. The vertical dotted line denotes the Fermi level.

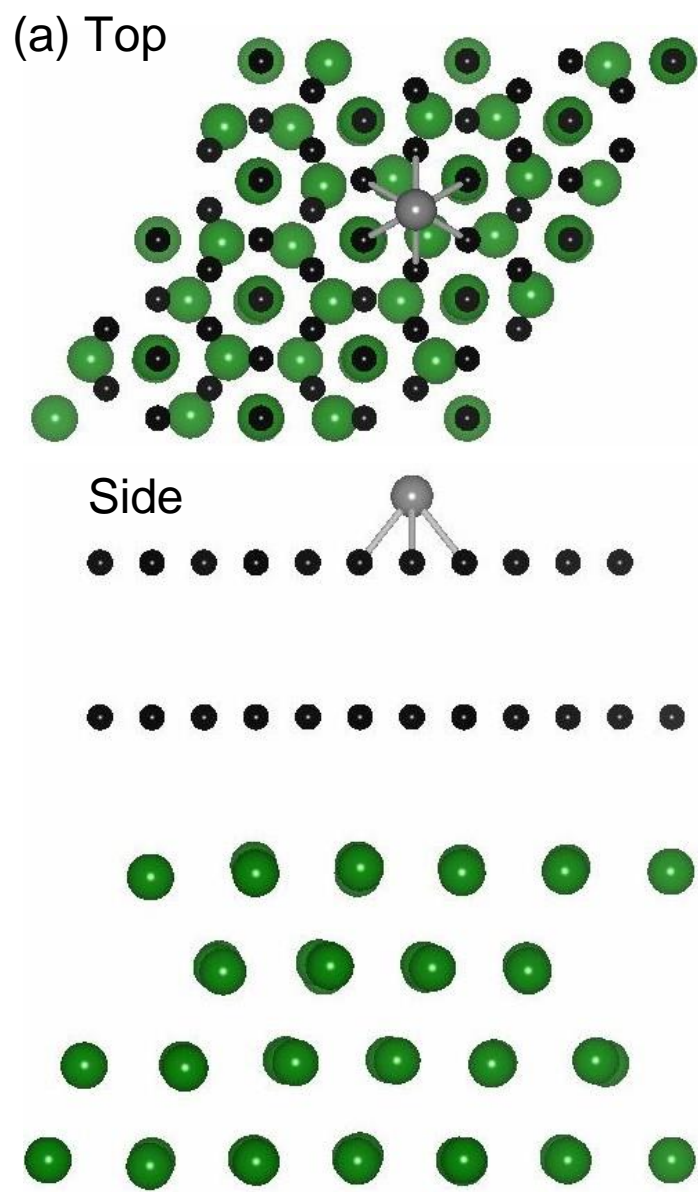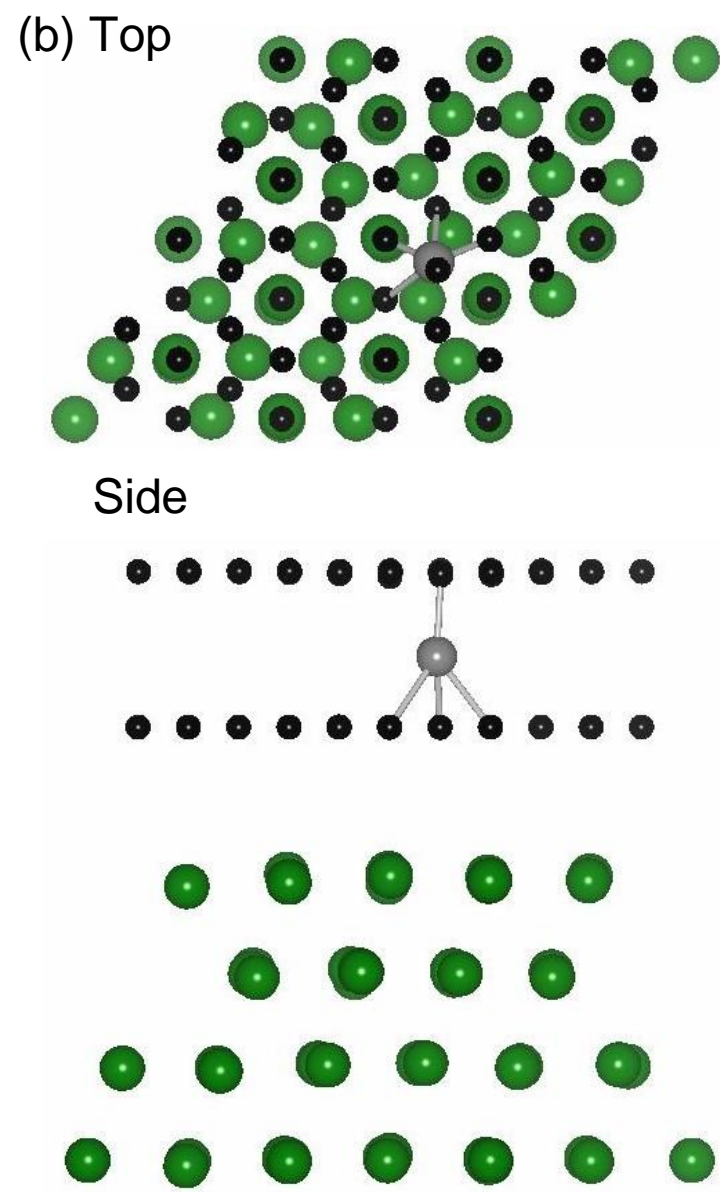

Fig. S1(a)-(b)

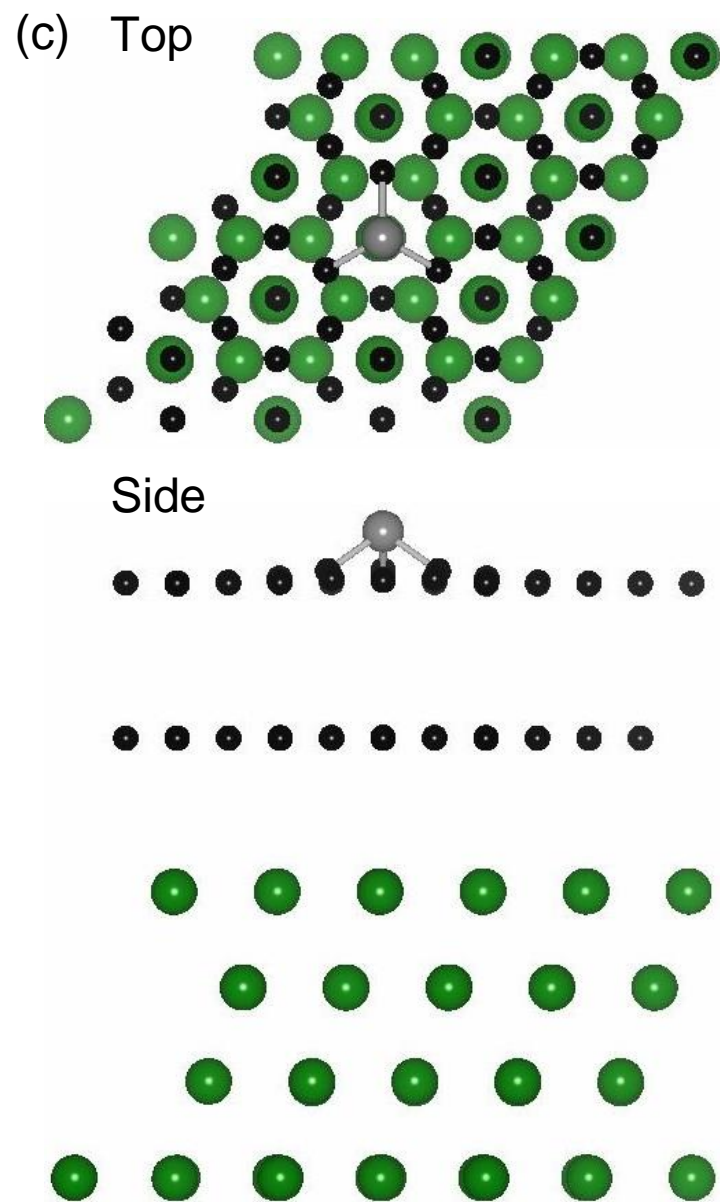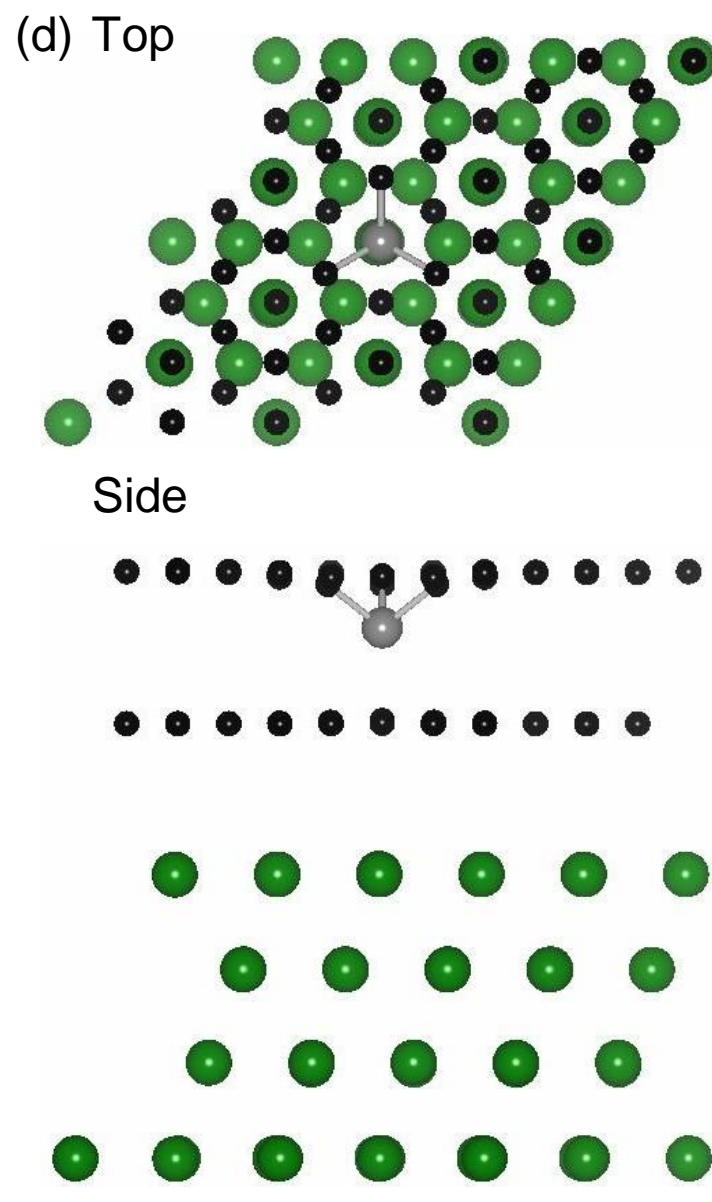

Fig. S1(c)-(d)

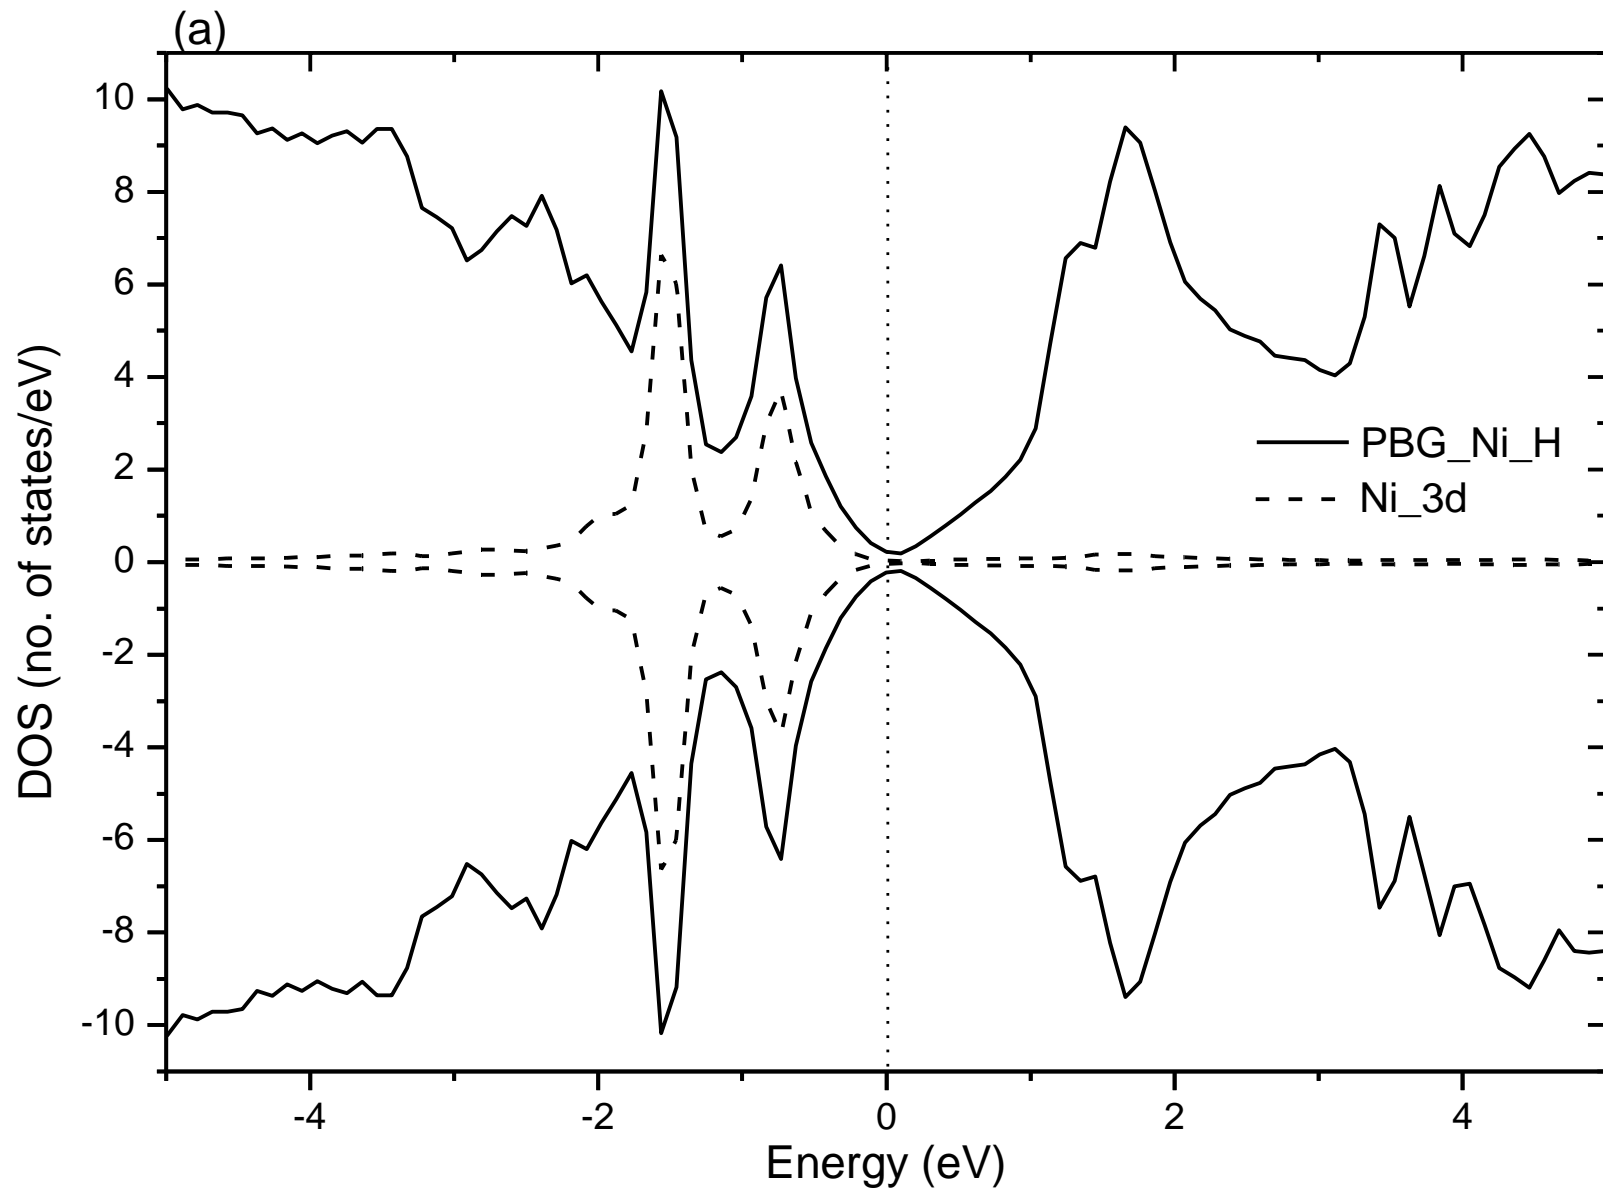

Fig. S2(a)

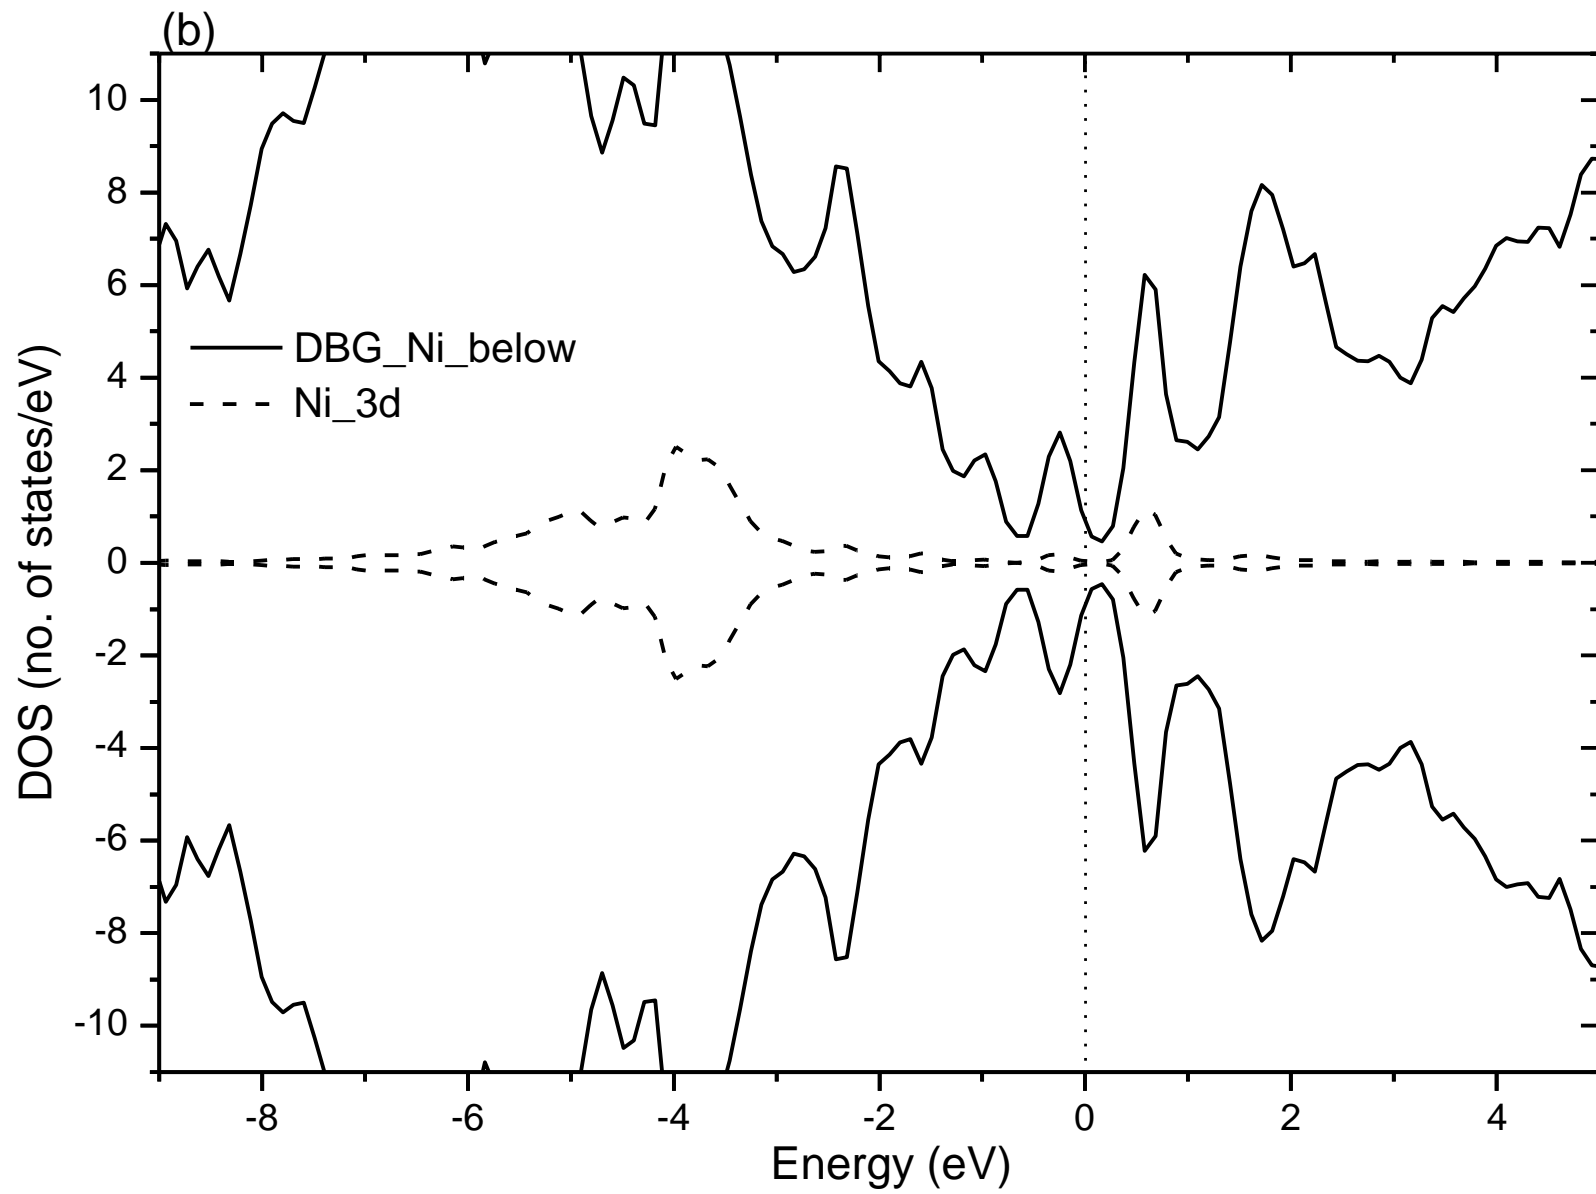

Fig. S2(b)

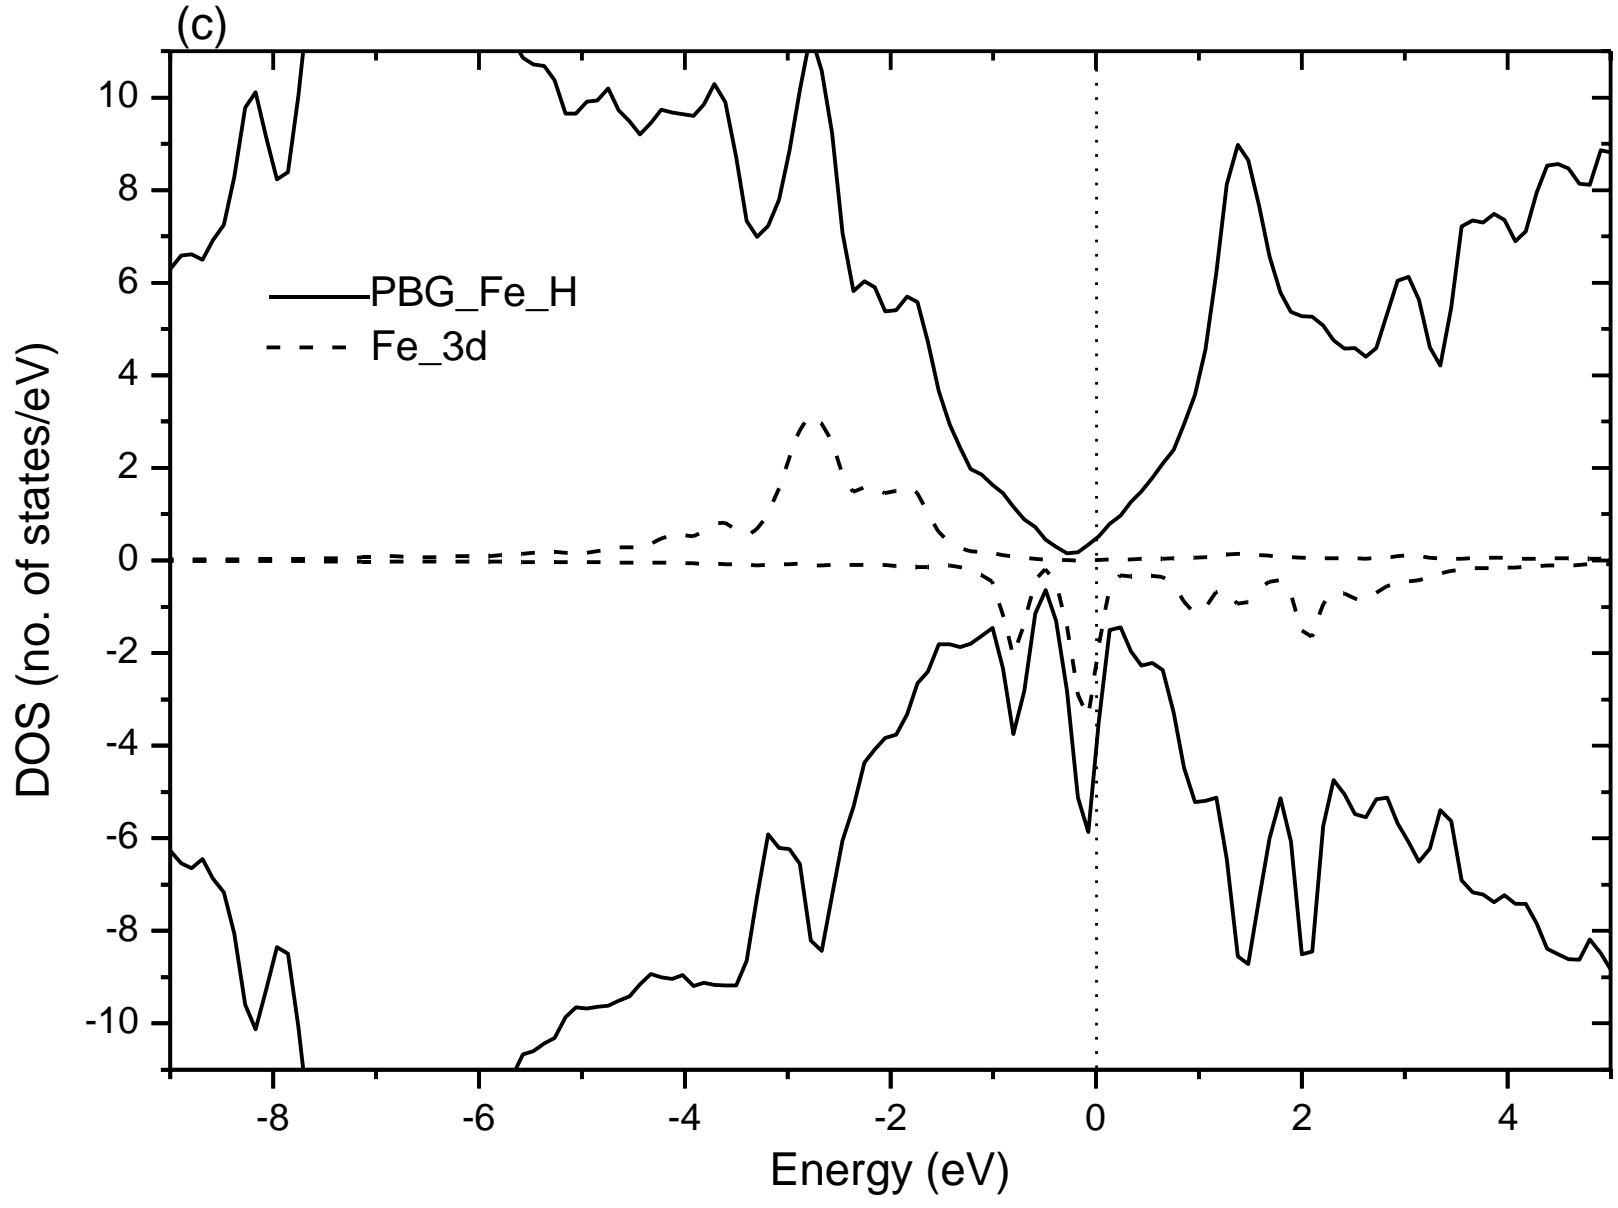

Fig. S2(c)

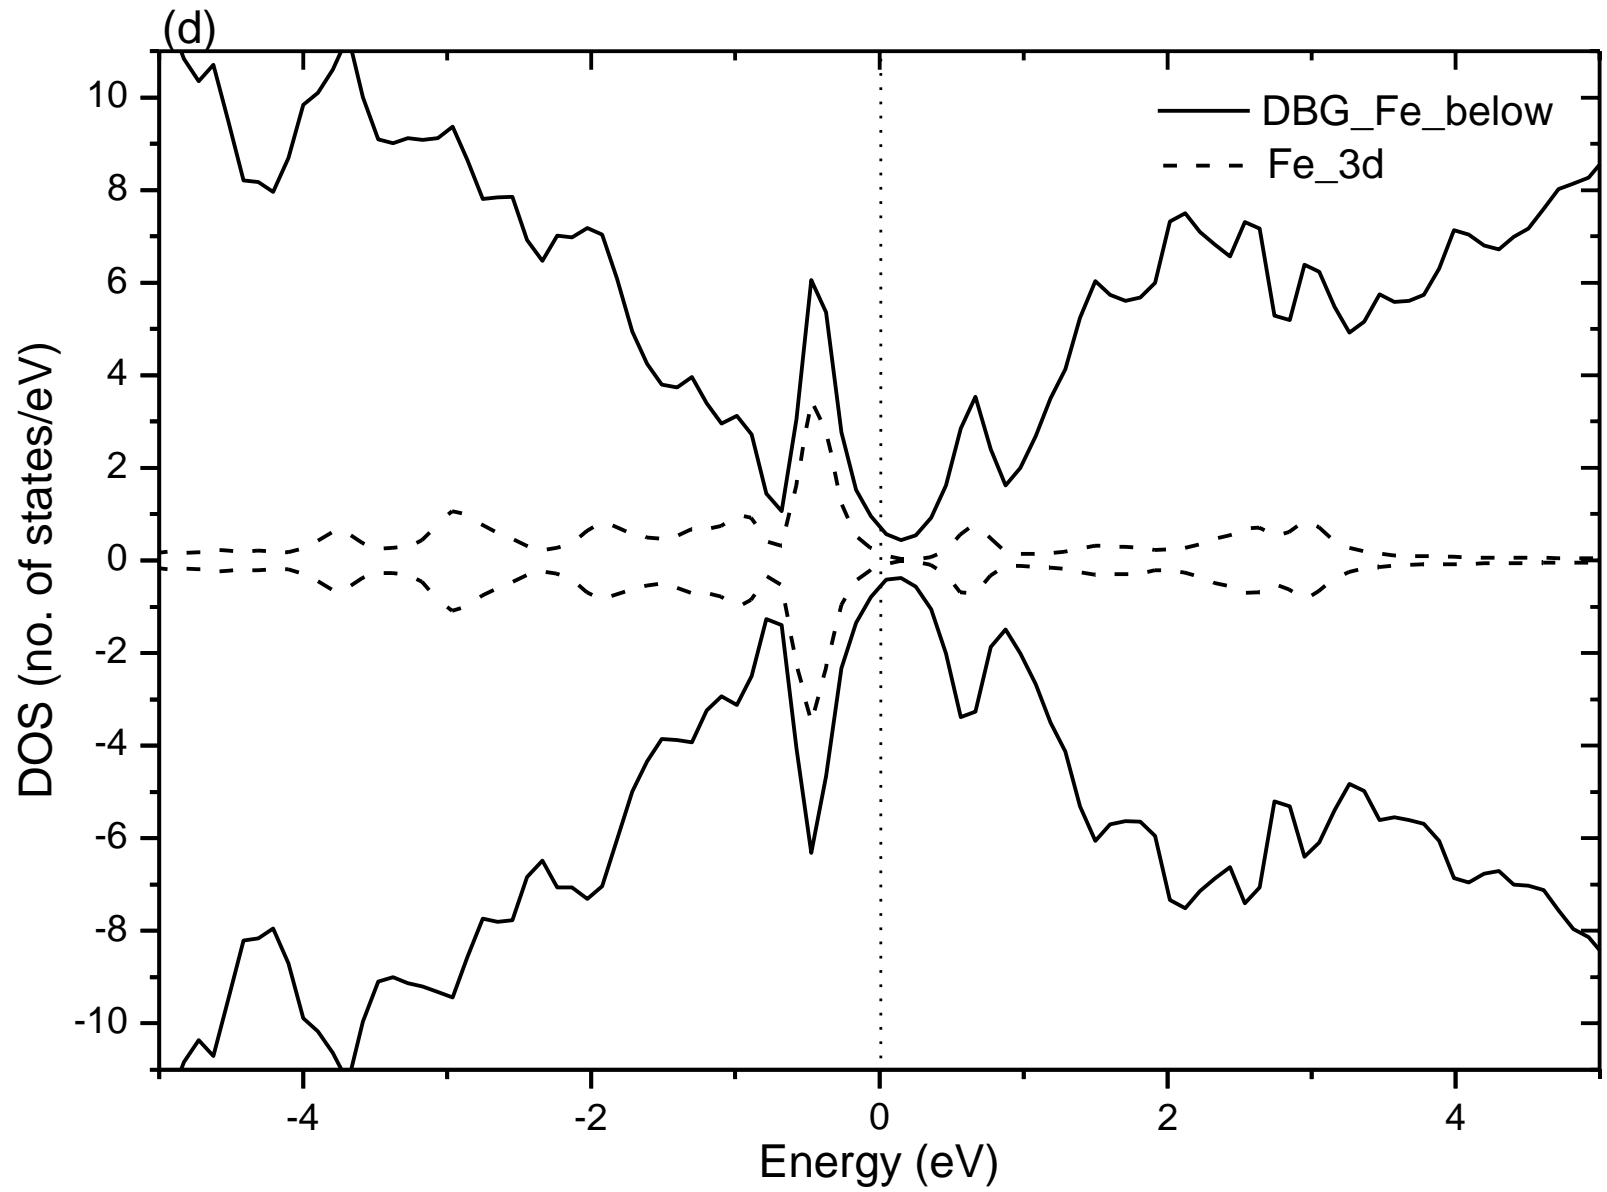

Fig. S2(d)
